## *Multimodal cell type correspondence by intersectional mFISH in intact tissues*

Philip R. Nicovich<sup>1</sup>, Michael J. Taormina<sup>1</sup>, Christopher A. Baker<sup>1</sup>, Thuc Nghi Nguyen<sup>1</sup>, Elliot R. Thomsen<sup>1</sup>, Emma Garren<sup>1</sup>, Brian Long<sup>1</sup>, Melissa Gorham<sup>1</sup>, Jeremy Miller<sup>1</sup>, Travis Hage<sup>1</sup>, Alice Bosma-Moody<sup>1</sup>, Gabe J. Murphy<sup>1</sup>, Boaz P. Levi<sup>1</sup>, Jennie L. Close<sup>1</sup>, Bosiljka Tasic<sup>1</sup>, Ed S. Lein<sup>1</sup>, Hongkui Zeng<sup>1</sup>

<sup>1</sup>Allen Institute for Brain Science, Seattle, Washington

### **Abstract**

Defining a complete set of cell types within the cortex requires reconciling disparate results achieved through diverging methodologies. To address this correspondence problem, multiple methodologies must be applied to the same cells in multiple single-cell experiments. Here we present an approach in which spatial transcriptomics using multiplexed fluorescence *in situ* hybridization (mFISH) on tissue previously interrogated through two-photon optogenetic mapping of synaptic connectivity can resolve the anatomical, transcriptomic, connectomic, electrophysiological, and morphological characteristics of single cells within the mouse cortex.

### **Main**

The parable of the Blind Men and the Elephant tells the story of a group of blind men, naïve to the nature of an elephant, presented with such a creature to try to conceptualize while observing only through touch (Figure 1A, upper). The men are each concerned with a single area and draw a conclusion for the whole based on their limited perspective. As scientists, we are similarly a group of observers each indirectly observing one portion of a large, hidden, and complex problem. The parable's moral is that these challenging concepts may have many facets individually revealed to those with diverging perspectives. To strive towards a comprehensive description, we must be able to synthesize these unique perspectives into a consistent whole.

This challenge of differing perspectives leading to seemingly conflicting outcomes is exemplified in attempts to understand the number and features of cell types within the mouse cortex (Fig 1A, lower). Recent studies report self-consistent outcomes based on anatomy<sup>1</sup>, transcriptomics<sup>2,3</sup>, electrophysiology<sup>4</sup>, morphology<sup>4</sup>, long-range<sup>5</sup> and local connectomics<sup>6</sup>, and *in vivo* recordings<sup>7</sup>. However, these studies markedly disagree on the number of underlying cell types. Even if they did agree on the number of types, how results from one study map to those of another is not obvious. To reconcile this problem of cell type correspondence, single-cells must traverse multiple modalities.

Each of these modalities, save transcriptomics, explicitly or implicitly carries spatial information within the specimen at single-cell resolution. Multiplexed fluorescence *in situ* hybridization (mFISH) enables a transcriptomic readout with this same single-cell spatial resolution. We have extended the hairpin

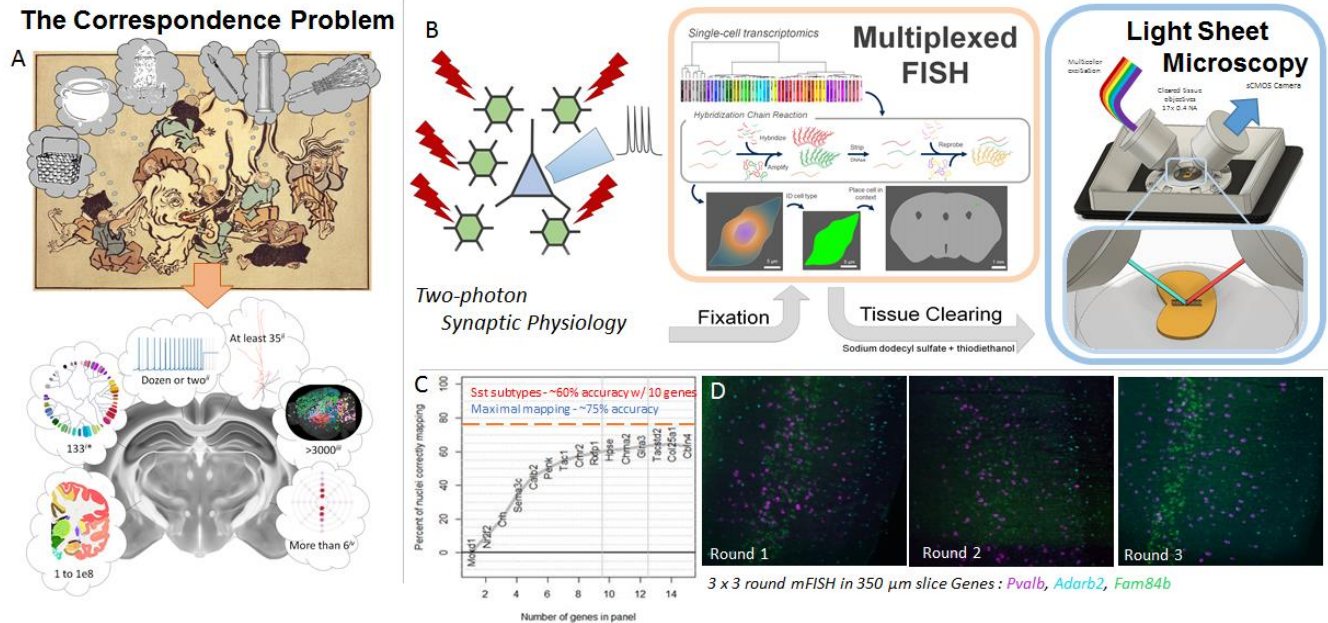

**Figure 1 - Overview of mFISH Light Sheet pipeline.** *A - The Correspondence Problem, demonstrated by the parable of the Blind Men and the Elephant. A modern scientific manifestation of this problem is generating agreement between cell type number, transcriptomic identity, physiology, morphology, connectivity, and function in the cortex.* *B – mFISH Light Sheet workflow. Tissue from an upstream modality is fixed, stained for mFISH, and imaged on a light sheet microscope. Multiple color channels and rounds of stripping and reprob against new transcript targets builds up a dataset of transcript abundance for target cells in the light sheet volumes.* *C – Bootstrap analysis to estimate mapping success as a function of gene information input in Sst cell types. Asymptote at ~60% correct mapping to transcriptomic leaf nodes is achieved in 9 genes, versus 75% correct mapping with ‘all’ (thousands of) genes.* *D – Repeated probing of a 350 μm thick slice by HCR and imaged by light sheet microscopy. All genes are visible in expected patterning across all rounds.*

chain reaction (HCR) approach<sup>8</sup> with DNase digestion for up to three rounds of probing with three spectrally-defined probes in each round. This protocol is compatible with paraformaldehyde-fixed mouse cortex tissue slices up to 350 μm thick.

To ensure target cells can be identified across subsequent experiments we chose to focus on those microscopy methods for mFISH readout that can be performed in these 350 μm thick, intact cortex tissues. For cortex tissue of this thickness, tissue clearing is required due to the highly scattering nature of native brain tissue. Clearing is readily achieved through incubation in index-matching fluid comprised of 67% thiodiethanol (TDE) in PBS. An inverted selective plane illumination microscope (iSPIM)<sup>9,10</sup> equipped with long-working-distance objectives compatible with the geometry and working fluid requirements (Special Optics, 16.7x/0.4 NA) yields rapid, full-thickness images at sub-cell resolution and high speed. Multicolor, full-thickness image volumes over many square mm of lateral area are captured in under an hour, an order of magnitude faster than on a point-scanning confocal.

A custom computational pipeline efficiently transforms these large, multi-color and multi-position 3D datasets from the as-acquired image stacks into aligned and stitched volumes readily explored through a web browser interface<sup>11</sup>. With each round of mFISH imaging as a separate volume, target cell locations from the upstream modality map to the same cells in each volume. Extracting fluorescent signals across all channels and rounds yields a transcriptomic identity for each target cell.

These advancements allow the spatial transcriptomics portion of the pipeline to intersect with a range of upstream modalities. These modalities must meet a set of the following compatibility criteria: 1) the

upstream modality must yield a tissue specimen compatible with downstream mFISH processing and imaging; 2) target cells of interest must be tagged with a fluorescent marker or markers that can be read out in both the upstream and mFISH modalities; 3) these target cells each must have a recorded spatial location within the specimen; and 4) these target cells should be sufficiently sparse for reliable mapping of upstream target cell locations into the mFISH volume coordinate space.

Two-photon optogenetic mapping of synaptic connectivity provides an exemplar use case for this approach<sup>12–15</sup> (Fig 1B). This modality uses two photon stimulation modified channelrhodopsins, either ReaChR<sup>16</sup> or Chrimson<sup>17</sup>, to probe cells for potential pre-synaptic connections to a selected patch-clamped cell. Dozens or hundreds of channelrhodopsin-expressing pre-synaptic cells can be probed in rapid succession for increased throughput compared to paired recordings. These experiments are performed in acute 350  $\mu\text{m}$ -thick slices of cortex from animals expressing the channelrhodopsin and reporter fluorescent protein in a target cell class within the mouse primary visual cortex. Channelrhodopsin-positive cells carry a YFP reporter and the patched cell passively filled with AlexaFluor dye and biotin through the recording. Post-experiment slices are fixed in PFA in anticipation of further processing.

Here channelrhodopsin expression, either through viral- or Cre-dependent transduction, is tied to the expression of somatostatin (*Sst*), a marker for a sub-class of inhibitory neurons<sup>18,19</sup>. This provides a good deal of *a priori* information about the transcriptomic identity of the target cells (as well as ensuring the sparsity of target cells desired for both the mFISH mapping and two photon optical stimulation steps). However, *Sst* is a broad marker with 21 identified transcriptomic sub-types in mouse cortex<sup>2,3</sup>. Post-hoc transcriptomic refinement with mFISH against selected transcriptomic targets can disambiguate the cell types within this class observed in a specimen.

A bootstrap approach to probe target selection yields an ordered list of marker transcripts best able to discern the different *Sst* subtypes (see mFISH gene selection in Methods). Given a reference single-cell RNA sequencing dataset<sup>2</sup>, mFISH-specific filters (including range of expression in expressing and non-expressing cells, mRNA length, and differential expression between types) refine the possible transcript target pool<sup>20</sup>. Selection begins with manually-selected marker genes (here *Sst* only) and additional targets from the filtered pool iteratively added while testing the confidence of single cells which include only selected gene targets mapping to the taxonomy built with the full reference dataset. The gene which most increases this mapping confidence is included in the selected target pool and the process repeats for choosing the next target.

This bootstrap method yields an asymptotic approach to approximately 60-65% correct mapping to an *Sst* sub-type using information only from *Sst* (provided by the optogenetic reporter) and 9 other genes. It is noteworthy that with the “full” transcriptomic data set single cells map to the correct sub-type approximately 75% of the time. Those incorrect mappings are nearly always due to inconclusive mappings at one node from the sub-type terminus or to a neighboring, closely-related sub type. With this it is apparent that three rounds of mFISH with three transcripts probed each round should be sufficient for disambiguation within a cell class, even within one as broad as the *Sst*-expressing interneurons.

In a wild-type mouse specimen we probed three transcripts repeatedly across three rounds (Fig 1D). These transcripts – *Pvalb*, *Adarb2*, and *Fam84b* – were chosen as genes with example ‘high’, ‘medium’, and ‘low’ expression levels and with characteristic expression patterns (*Pvalb* and *Adarb2* in mutually-exclusive lineages of inhibitory neurons and *Fam84b* in cortical layer 5 excitatory neurons)<sup>2,3,20</sup>.

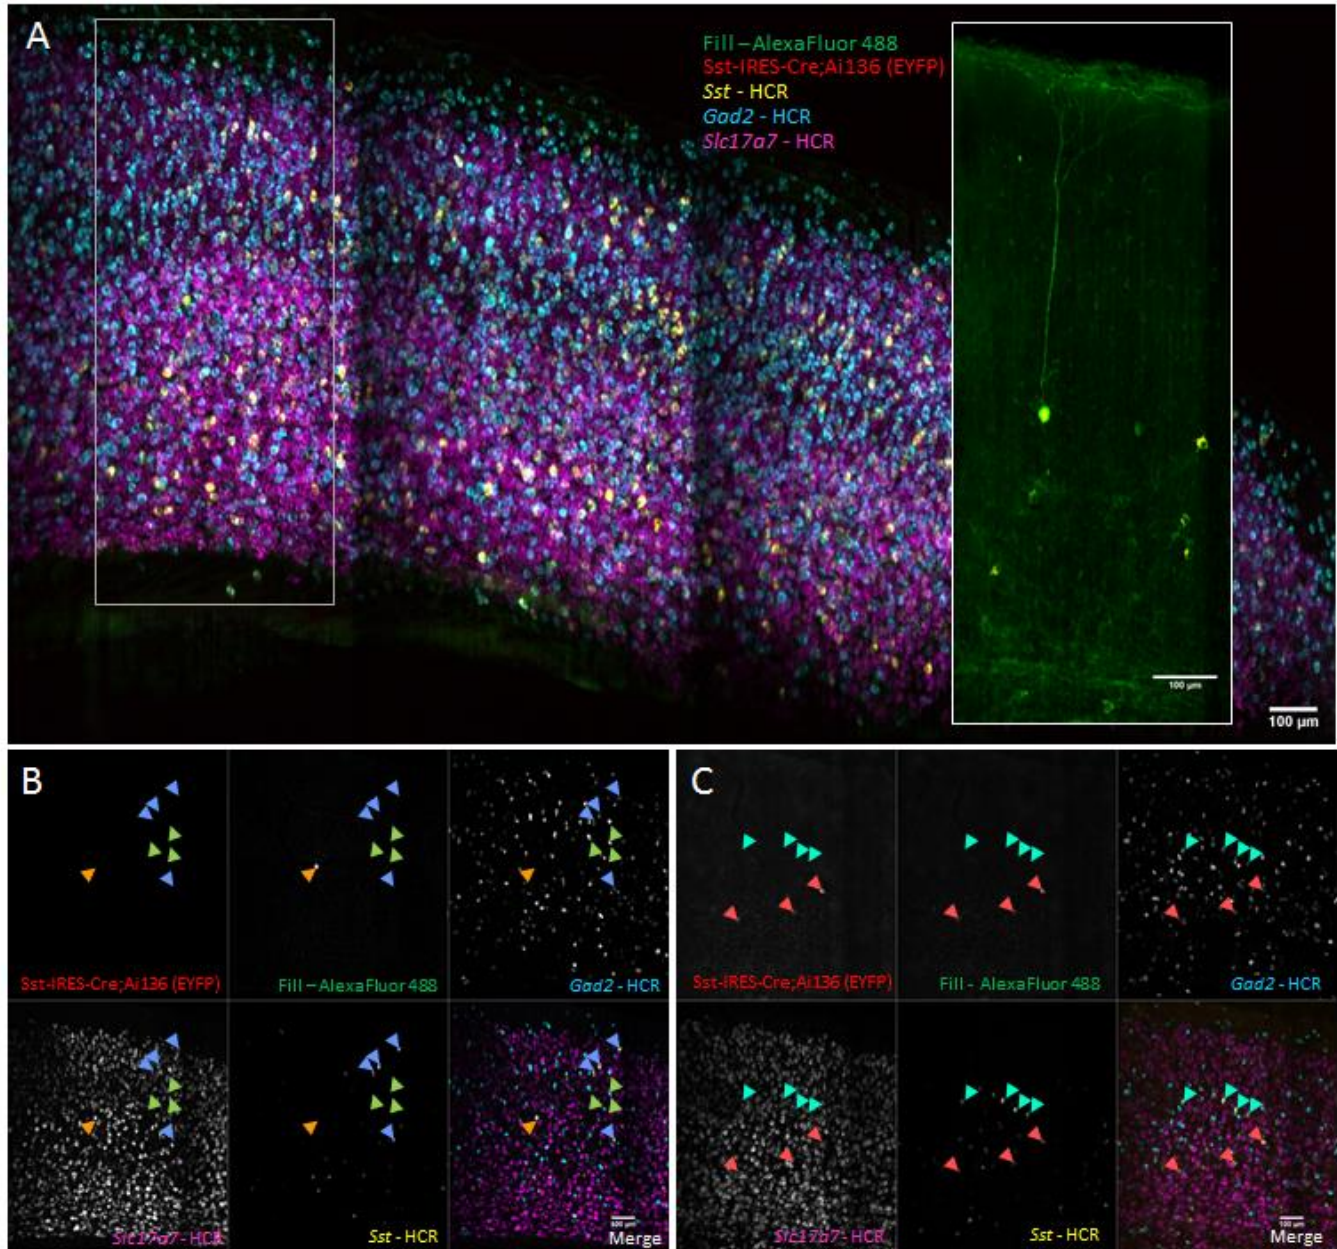

**Figure 2 - Cell class identification by mFISH Light Sheet.** *A* - 3 mm x 2 mm x 0.35 mm cleared mouse brain cortex slice imaged on the light sheet microscope. Signal for a filled cell from upstream a synaptic physiology experiment, Cre-dependent opsin reporter, and three transcripts probed by HCR is visible. Inset shows box area in fill and reporter channel only. *B* - Filled cell (orange marker) shows expression of *Slc17a7* and not *Gad2*, confirming excitatory cell morphology observed in *A*. All *Sst*-positive cells (blue) show expression of *Gad2*, but not all *Gad2*-positive cells show *Sst* expression (*Gad*+/*Sst*-, green markers). *C* - Opsin reporter-positive cell all show *Sst* expression (reporter+/*Sst*+ vermilion markers) but not all *Sst*-positive cells show opsin reporter signal (reporter-/*Sst*+ turquoise markers).

Fluorophores and HCR initiator sequences corresponding to a given target were cycled across rounds such that incomplete stripping between rounds or failed re-probing would be apparent as errant signal. In each round, the specimens were imaged on the iSPIM microscope and data passed through the data processing pipeline. The resulting images show that across three rounds all three probes are successfully repeatedly probed. The expected pattern of expression for each target is apparent in all three rounds.

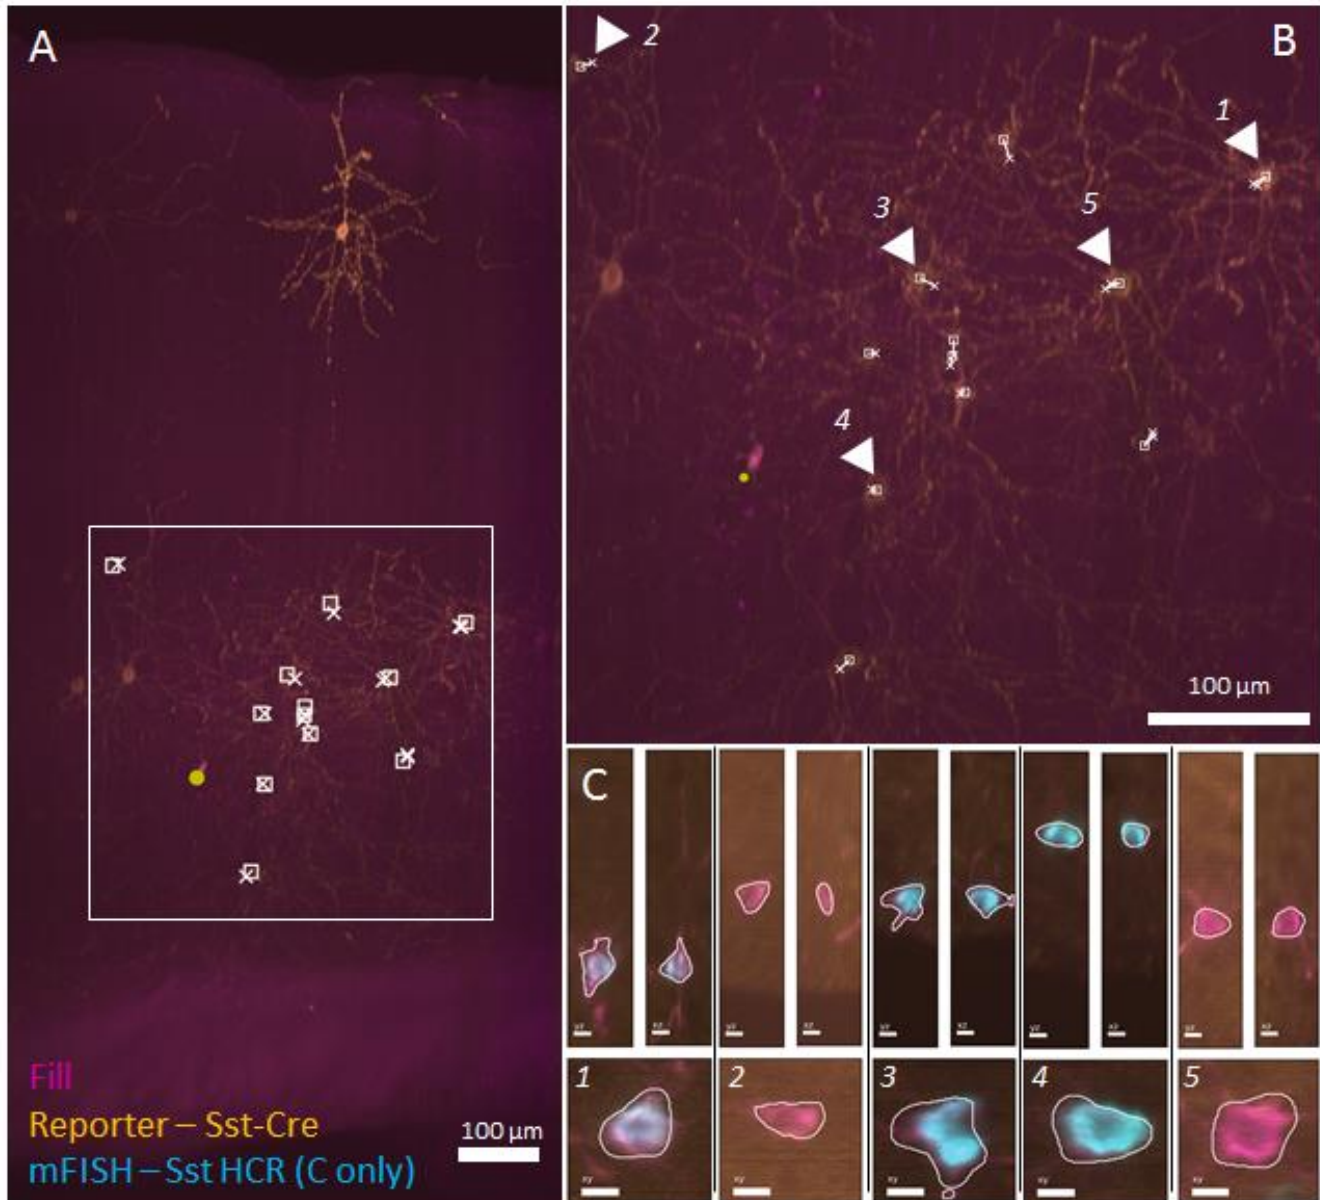

Figure 3 - mFISH Light Sheet on a Two-photon Synaptic Physiology slice. A - Slice previously probed by Synaptic Physiology, stained for *Sst* by HCR (shown in C only), and imaged on the iSPIM microscope. Full-thickness maximum intensity projection of 350  $\mu\text{m}$  thick slice shown. Patched and filled cell indicated by yellow circle. White 'X' indicates manual alignment of upstream target point cloud; white squares indicate computer-assisted alignment. B - Inset showing region of slice with patched cells. C - ROIs taken around indicated target cells. White outlines indicate automatic segmentation boundary with plane shown corresponding to center of mass of segmented region. Note not all *Sst-Cre* reporter positive cells contain signal for *Sst HCR*.

Given that the lowest-expressed gene, *Fam84b*, gives strong signal even in the final round, there is minimal apparent mRNA loss even after two DNase stripping cycles and 13 days of mFISH processing and imaging.

Intact specimens carried forward from synaptic physiology experiments are similarly successfully probed through mFISH. A single-round experiment (Figure 2A) shows the filled cell (AlexaFluor 488 fill and streptavidin-AlexaFluor 488) along with the *Sst-YFP* cells detectable in the imaged region of mouse visual cortex. Capturing this image volume of  $\sim 3 \text{ mm} \times 2 \text{ mm} \times 0.5 \text{ mm}$  with sampling  $370 \text{ nm} \times$

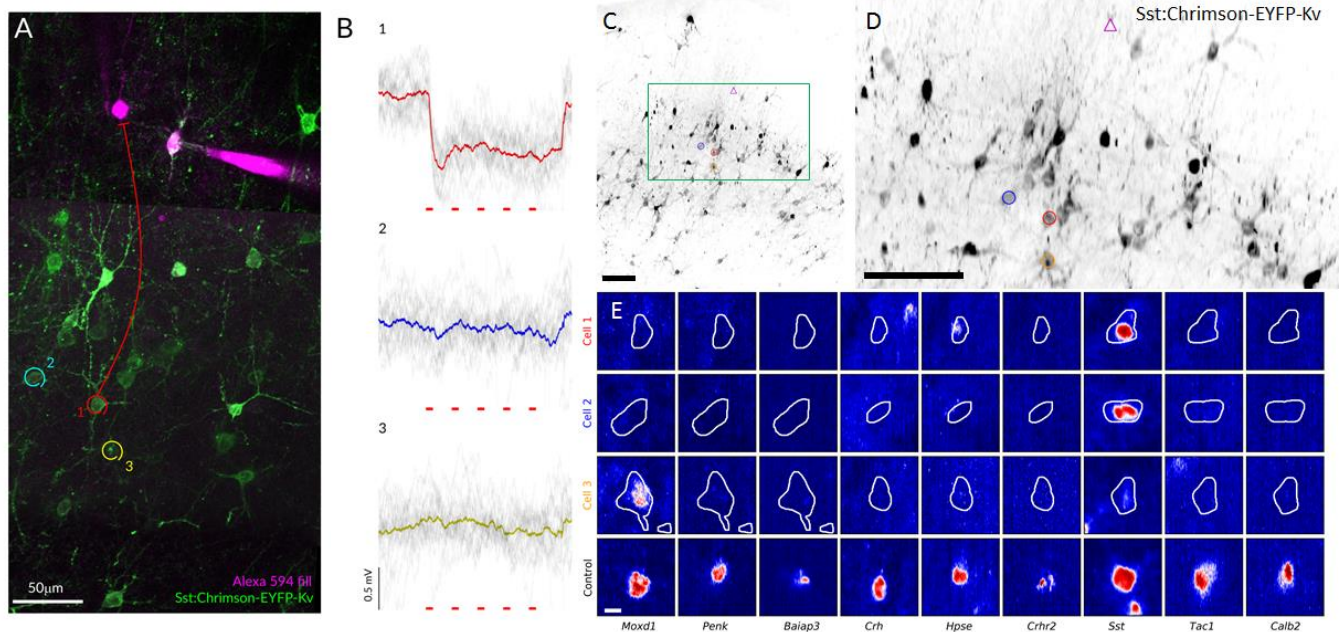

Figure 4 - Investigating cell-type connection rates by mFISH Light Sheet - A – Image from two-photon synaptic physiology experiment. Cells in question are marked in red, blue, and yellow. B – Stimulation traces from two-photon synaptic physiology experiment. Cell 1 (red) shows a connection to patched cell indicated in A. C – Slice view of reporter fluorescence on light sheet microscope. D – Inset of C. Cells marked with circles correspond to A. Diamond is location of patched cell. E – Image-based heat map of log transformed intensity for all 9 genes across three profiled cells. White outline is border of cell defined by reporter fluorescence. Control row is a positive cell for each profiled gene. Each column colormap is normalized to positive control cell signal.

740 nm x 260 nm across 5 spectral channels was completed within 45 minutes. The cell fill and patch clamp recordings are consistent with an excitatory cell. HCR signal confirms expression of *Slc17a7*, a canonical marker gene for excitatory cells. Within this specimen, all cells with *Sst* signal also show signal for *Gad2*, but with many *Gad2*-positive cells being *Sst* negative; this is consistent with the latter being a marker for inhibitory cells, of which the former is a subset. In addition, those cells with signal in the optogenetic *Sst*-dependent ReaChR-YFP reporter are wholly subset of cells showing *Sst* expression by mFISH. This demonstrates the modest efficiency, but high specificity, of channelrhodopsin expression through the TIGRE locus<sup>19</sup> used here.

A specimen expressing a nominally *Sst*-dependent optogenetic reporter, ChrimsonR, through the TIGRE 2.0 locus shows an interesting contrast<sup>18</sup> (Figure 3). Target cells within this specimen were probed through the synaptic physiology workflow and single-gene mFISH probing. Again, the filled cell (AlexaFluor 488 fill and streptavidin-AlexaFluor 488) and soma-localized opsin reporter (Chrimson-EYFP) were apparent in the mFISH image volume. Our computational workflow maps the synaptic physiology target cell coordinate set to cells within the mFISH volume. Extracted sub-volumes around each target cell yield cell boundaries within the light sheet image volume based on the reporter signal channel (Fig 3C). This mask applied to the HCR channel yields information about the gene expression in the target cells.

In this specimen, a cell with opsin reporter signal does not always carry observable mFISH signal for *Sst*. This difference could imply transitional or development-dependent Cre expression or other cell state *versus* cell type distinctions. This difference would not be clear without profiling both reporter and transcript signals. Even without an upstream intersecting modality the mFISH Light Sheet pipeline is an

effective means to discern this information. With the intersecting modality, how these subtle cell type differences manifest as differences in connectomics, morphology, function, or other metrics can become apparent.

The grand wish for this approach is to first extend the transcriptomic resolution to allow putative cell type mapping and then apply this to specific cells with clear connectomic results. Figure 4 shows an example of this desired outcome. A slice expressing a channelrhodopsin (*via* injection of virus encoding Cre-dependent ChrimsonR-Kv2.1<sup>21,22</sup>) in Sst-IRES-Cre+ cells probed in the two photon synaptic physiology pipeline demonstrates a connection between an optically-targeted cell (Fig 4A and 4B, red) and a patched cell. Neighboring cells show no detected connection (Fig 4A and B, blue and yellow) to the patched cell. These cells can be located across multiple rounds of HCR staining, light sheet imaging, and stripping (2<sup>nd</sup> of 3 rounds shown in Fig 4 C and D). The HCR signal for each cell and color-round gives an expression profile across the 9 transcripts probed for each target cell.

All 9 probed genes show signal across this three round experiment, confirming that the transcriptomic resolution required to map to the cell type level is achievable (Fig 1C), though further refinement may be required for the specific case of mapping *Sst* subtypes. The target cell showing a connection to the patched cell does show expression for *Sst* as well as moderate expression for *Hpse*, a marker for a transcriptomically-distinct *Sst* sub-type. The other two target cells do not share this same expression profile. Cell 2 does not show *Hpse* expression and Cell 3 has much lower *Sst* expression with clear *Moxdl* expression. These results show that the combination of synaptic physiology and mFISH Light Sheet is capable of discerning the differences in transcriptomic state of target cells within a broad interneuron class. With sufficient accumulation of connectomics data, enabled by the increased throughput of the two photon synaptic physiology approach, this can yield cell-type-specific rates for local neuronal connectivity.

Potentially this approach can be generalized to intersect with other modalities operating on a single piece of tissue, given the specific constraints for downstream mFISH Light Sheet profiling. Especially beneficial is the rapid light sheet imaging step which, in principle, can cover an unlimited lateral area and up to 4 mm deep, making this a prime approach for *in situ* screening of viral or transgenic tools in conjunction with cell-type-level transcriptomic profiling of target cells. As the pipeline built around these methods nears completion, we look forward to directly addressing questions of multimodal cell type correspondence within the brain.

## Acknowledgements

We thank the Allen Institute founder, Paul G. Allen, for his vision, encouragement and support. We thank Jon Daniels and Applied Scientific Instrumentation, Inc., Harry Choi and Molecular Technologies, and Robert Campbell and Michael Davidson for support of instrumentation and reagents for this work. The authors acknowledge program management support of Dr. Susan Sunkin to enable these studies.

- (1) Lein, E. S.; Hawrylycz, M. J.; Ao, N.; Ayres, M.; Bensinger, A.; Bernard, A.; Boe, A. F.; Boguski, M. S.; Brockway, K. S.; Byrnes, E. J.; et al. Genome-Wide Atlas of Gene Expression in the Adult Mouse Brain. *Nature* **2006**, *445*, 168.
- (2) Tasic, B.; Yao, Z.; Graybuck, L. T.; Smith, K. A.; Nguyen, T. N.; Bertagnolli, D.; Goldy, J.; Garren, E.; Economo, M. N.; Viswanathan, S.; et al. Shared and Distinct Transcriptomic Cell Types across Neocortical Areas. *Nature* **2018**, *563* (7729), 72–78.

- (3) Tasic, B.; Menon, V.; Nguyen, T. N.; Kim, T. K.; Jarsky, T.; Yao, Z.; Levi, B.; Gray, L. T.; Sorensen, S. A.; Dolbeare, T.; et al. Adult Mouse Cortical Cell Taxonomy Revealed by Single Cell Transcriptomics. *Nat. Neurosci.* **2016**, *19* (2), 335–346.
- (4) Gouwens, N. W.; Berg, J.; Feng, D.; Sorensen, S. A.; Zeng, H.; Hawrylycz, M. J.; Koch, C.; Arkhipov, A. Systematic Generation of Biophysically Detailed Models for Diverse Cortical Neuron Types. *Nat. Commun.* **2018**, *9* (1), 710.
- (5) Harris, J. A.; Mihalas, S.; Hirokawa, K. E.; Whitesell, J. D.; Knox, J.; Bernard, A.; Bohn, P.; Caldejon, S.; Casal, L.; Cho, A.; et al. The Organization of Intracortical Connections by Layer and Cell Class in the Mouse Brain. *bioRxiv* **2018**, 292961.
- (6) Seeman, S. C.; Campagnola, L.; Davoudian, P. A.; Hoggarth, A.; Hage, T. A.; Bosma-Moody, A.; Baker, C. A.; Lee, J. H.; Mihalas, S.; Teeter, C.; et al. Sparse Recurrent Excitatory Connectivity in the Microcircuit of the Adult Mouse and Human Cortex. *bioRxiv* **2018**, 292706.
- (7) de Vries, S. E. J.; Lecoq, J.; Buice, M. A.; Groblewski, P. A.; Ocker, G. K.; Oliver, M.; Feng, D.; Cain, N.; Ledochowitsch, P.; Millman, D.; et al. A Large-Scale, Standardized Physiological Survey Reveals Higher Order Coding throughout the Mouse Visual Cortex. *bioRxiv* **2018**, 359513.
- (8) Choi, H. M. T.; Beck, V. A.; Pierce, N. A. Next-Generation in Situ Hybridization Chain Reaction: Higher Gain, Lower Cost, Greater Durability. *ACS Nano* **2014**, *8* (5), 4284–4294.
- (9) Kumar, A.; Wu, Y.; Christensen, R.; Chandris, P.; Gandler, W.; McCreedy, E.; Bokinsky, A.; Colon-Ramos, D. A.; Bao, Z.; McAuliffe, M.; et al. Dual-View Plane Illumination Microscopy for Rapid and Spatially Isotropic Imaging. *Nat. Protoc.* **2014**, *9* (11), 2555–2573.
- (10) Kumar, A.; Christensen, R.; Guo, M.; Chandris, P.; Duncan, W.; Wu, Y.; Santella, A.; Moyle, M.; Winter, P. W.; Colon-Ramos, D.; et al. Using Stage- and Slit-Scanning to Improve Contrast and Optical Sectioning in Dual-View Inverted Light Sheet Microscopy (diSPIM). *Biol. Bull.* **2016**, *231* (1), 26–39.
- (11) Vogelstein, J. T.; Perlman, E.; Falk, B.; Baden, A.; Gray Roncal, W.; Chandrashekar, V.; Collman, F.; Seshamani, S.; Patsolic, J. L.; Lillaney, K.; et al. A Community-Developed Open-Source Computational Ecosystem for Big Neuro Data. *Nat. Methods* **2018**, *15* (11), 846–847.
- (12) Prakash, R.; Yizhar, O.; Grewe, B.; Ramakrishnan, C.; Wang, N.; Goshen, I.; Packer, A. M.; Peterka, D. S.; Yuste, R.; Schnitzer, M. J.; et al. Two-Photon Optogenetic Toolbox for Fast Inhibition, Excitation and Bistable Modulation. *Nat. Methods* **2012**, *9* (12), 1171.
- (13) Izquierdo-Serra, M.; Hirtz, J. J.; Shababo, B.; Yuste, R. Two-Photon Optogenetic Mapping of Excitatory Synaptic Connectivity and Strength. *iScience* **2018**, *8*, 15–28.
- (14) Packer, A. M.; Peterka, D. S.; Hirtz, J. J.; Prakash, R.; Deisseroth, K.; Yuste, R. Two-Photon Optogenetics of Dendritic Spines and Neural Circuits. *Nat. Methods* **2012**, *9* (12), 1202.
- (15) Baker, C. A.; Elyada, Y. M.; Parra, A.; Bolton, M. M. Cellular Resolution Circuit Mapping with Temporal-Focused Excitation of Soma-Targeted Channelrhodopsin. *Elife* **2016**, *5*, e14193.



- (16) Lin, J. Y.; Knutsen, P.; Muller, A.; Kleinfeld, D.; Tsien, R. Y. ReaChR: A Red-Shifted Variant of Channelrhodopsin Enables Deep Transcranial Optogenetic Excitation. *Nat. Neurosci.* **2013**, *16* (10), 1499–1508.
- (17) Klapoetke, N. C.; Murata, Y.; Kim, S.; Pulver, S. R.; Birdsey-Benson, A.; Cho, Y.; Morimoto, T. K.; Chuong, A. S.; Carpenter, E. J.; Tian, Z.; et al. Independent Optical Excitation of Distinct Neural Populations. *Nat. Methods* **2014**, *11* (3), 338–346.
- (18) Daigle, T. L.; Madisen, L.; Hage, T. A.; Valley, M. T.; Knoblich, U.; Larsen, R. S.; Takeno, M. M.; Huang, L.; Gu, H.; Larsen, R.; et al. A Suite of Transgenic Driver and Reporter Mouse Lines with Enhanced Brain-Cell-Type Targeting and Functionality. *Cell* **2018**, *174* (2), 465–480.e22.
- (19) Madisen, L.; Garner, A. R.; Shimaoka, D.; Chuong, A. S.; Klapoetke, N. C.; Li, L.; van der Bourg, A.; Niino, Y.; Egolf, L.; Monetti, C.; et al. Transgenic Mice for Intersectional Targeting of Neural Sensors and Effectors with High Specificity and Performance. *Neuron* **2015**, *85* (5), 942–958.
- (20) Hodge, R. D.; Bakken, T. E.; Miller, J. A.; Smith, K. A.; Barkan, E. R.; Graybuck, L. T.; Close, J. L.; Long, B.; Penn, O.; Yao, Z.; et al. Conserved Cell Types with Divergent Features between Human and Mouse Cortex. *bioRxiv* **2018**, 384826.
- (21) Zhang, Z.; Feng, J.; Wu, C.; Lu, Q.; Pan, Z.-H. Targeted Expression of Channelrhodopsin-2 to the Axon Initial Segment Alters the Temporal Firing Properties of Retinal Ganglion Cells. *PLoS One* **2015**, *10* (11), e0142052.
- (22) Lim, S. T.; Antonucci, D. E.; Scannevin, R. H.; Trimmer, J. S. A Novel Targeting Signal for Proximal Clustering of the Kv2.1 K<sup>+</sup> Channel in Hippocampal Neurons. *Neuron* **2000**, *25* (2), 385–397.
- (23) Li, L.; Tasic, B.; Micheva, K. D.; Ivanov, V. M.; Spletter, M. L.; Smith, S. J.; Luo, L. Visualizing the Distribution of Synapses from Individual Neurons in the Mouse Brain. *PLoS One* **2010**, *5* (7), e11503.
- (24) Zeng, H.; Horie, K.; Madisen, L.; PLoS ..., P. M. N. An Inducible and Reversible Mouse Genetic Rescue System. **2008**.
- (25) Nicovich, P. R.; Walsh, J.; Böcking, T.; Gaus, K. NicoLase - An Open-Source Diode Laser Combiner, Fiber Launch, and Sequencing Controller for Fluorescence Microscopy. *PLoS One* **2017**, *12* (3).

## Methods

### *Animals and transgene expression*

All animal housing and procedures were conducted under protocols consistent with the National Institutes of Health guidelines and approved by the Institutional Animal Care and Use Committee at the Allen Institute (Seattle, WA). To establish the general utility of our mFISH pipelines we examined animals from multiple sources, including Sst-Cre driver mice crossbred with ROSA26-ZtTA/J mice<sup>23</sup> (Jackson Laboratory) and Ai136 mice<sup>18</sup>, in which a fusion of the ReaChR opsin<sup>16</sup> with EYFP is expressed from the TIGRE locus<sup>19,24</sup> in a Cre- and tetracycline transactivator (tTA)-dependent manner (Figure 2 experiments). We also examined the same Sst-Cre driver mice crossed with the new Ai167 line with both the ChrimsonR opsin<sup>17</sup> and the tTA contained within the new TIGRE 2.0 cassette<sup>18</sup> (Figure 3 experiments). In other experiments (Figure 4), ~P28 Sst-Cre driver mice were anesthetized with an isoflurane/oxygen mixture and 200nL of adenoassociated virus (AAV) serotype 1 (~5×10<sup>12</sup> genome copy units/mL) was injected through a small craniotomy at 0.3 mm and 0.6 mm beneath the surface of primary visual cortex (3.16mm anterior and 2.75mm lateral to bregma). The AAV delivered a bicistronic construct consisting of ChrimsonR fused to a Kv2.1 somatic localization motif<sup>21,22</sup> that has been shown to enhance resolution and sensitivity for two-photon optogenetic mapping experiments<sup>15</sup>. Nuclei of opsin-positive cells were visualized using a Histone2B fusion protein with mTFP1 (a gift from Robert Campbell & Michael Davidson; Addgene plasmid # 54553 ; <http://n2t.net/addgene:54553> ; RRID:Addgene\_54553; Ai et al., 2006).

### *Tissue preparation for synaptic physiology*

Recording preparations were made per established pipelines for electrophysiological characterization of mouse neurons<sup>4,6</sup>, and all solutions were maintained under 95% O<sub>2</sub>/ 5% CO<sub>2</sub>. Under deep isoflurane anesthesia, mice (P40-60) of either sex were transcardially perfused with cold artificial cerebrospinal fluid (aCSF-1) containing (in mM): 98 HCl, 96 N-methyl-d-glucamine (NMDG), 2.5 KCl, 25 D-Glucose, 25 NaHCO<sub>3</sub>, 17.5 4-(2-hydroxyethyl)-1-piperazineethanesulfonic acid (HEPES), 12 N-acetylcysteine, 10 MgSO<sub>4</sub>, 5 Na-L-Ascorbate, 3 Myo-inositol, 3 Na Pyruvate, 2 Thiourea, 1.25 NaH<sub>2</sub>PO<sub>4</sub>, 0.5 CaCl<sub>2</sub>, and 0.01 taurine. Parasagittal slices 350 μm thick were prepared in cold aCSF-1 with a Compresstome (Precisionary Instruments) using a 17° slicing angle to preserve apical dendrites of neurons in primary visual cortex. Slices were maintained in a holding chamber (BSK 12, Scientific Systems Design) containing oxygenated aCSF-1 at 34°C for 10 min (Ting et al., 2014; Hájos and Mody, 2009) before transfer to ambient temperature holding solution (aCSF-2) containing (in mM) 94 NaCl, 25 D-Glucose, 25 NaHCO<sub>3</sub>, 14 HEPES, 12.3 N-acetylcysteine, 5 Na-L-Ascorbate, 3 Myo-inositol, 3 Na Pyruvate, 2.5 KCl, 2 CaCl<sub>2</sub>, 2 MgSO<sub>4</sub>, 2 Thiourea, 1.25 NaH<sub>2</sub>PO<sub>4</sub>, 0.01 Taurine for a minimum of one hour prior to recording.

### *Electrophysiology and optogenetic mapping*

Electrophysiological recordings were conducted at 31–33°C in custom chambers perfused (2 mL/min) with aCSF-5 containing (in mM): 2 CaCl<sub>2</sub>, 12.5 D-Glucose, 2 MgSO<sub>4</sub>, 1.25 NaH<sub>2</sub>PO<sub>4</sub>, 3 KCl, 18

NaHCO<sub>3</sub>, 126 NaCl, 0.16 Na L-Ascorbate. Filamented borosilicate glass pipettes were pulled to a tip resistance of 3–8 MΩ (diameter ~ 1.25 μm), and filled with internal solution containing (in mM): 130 K-gluconate, 10 HEPES, 0.3 ethylene glycol-bis(β-aminoethyl ether)-N,N,N',N'-tetraacetic acid (EGTA), 3 KCl, 0.23 Na<sub>2</sub>GTP, 6.35 Na<sub>2</sub>Phosphocreatine, 3.4 Mg-ATP, 13.4 Biocytin, and either 50 μM Alexa-594 or Alexa-488 hydrazide (Thermo Fisher Scientific). Signals were amplified using Multiclamp 700B amplifiers (Molecular Devices) and digitized at 50–200 kHz using ITC-1600 digitizers (Heka). Custom software, Multi-channel Igor Electrophysiology Suite (MIES; <https://github.com/AllenInstitute/MIES>), written in Igor Pro (WaveMetrics), was used for data acquisition.

For two-photon mapping experiments, 1-4 neurons were patched and their intrinsic properties measured at their normal resting potential before maintaining cells at either -70mV or -55mV *via* current injection to isolate excitatory or inhibitory postsynaptic potentials, respectively. Virally transduced cells were visualized through a 40× 1.0 NA water immersion objective (Zeiss) on a two-photon laser scanning microscope (Bruker Corp) with a tunable pulsed Ti:Sapphire laser (Chameleon Ultra, Coherent). Desired cells were individually photostimulated with a 1060 nm pulsed laser (Fidelity Femtosecond, Coherent) using galvo mirrors controlled by PrairieView software (Bruker Corp) to steer the beam through five revolutions of a 10 μm in diameter spiral over a 10 ms duration. Stimulation power was controlled by a Pockels cell (Conoptics) and was maintained at a level that elicited action potentials in each of 10 trials across > 90% of the cells tested. This varied as a function of opsin and transgene delivery but ranged from 18-85mW at the objective. Control experiments established that displacement of the stimulation focus from a recorded opsin-positive neuron by 12 μm laterally or 27 μm axially resulted in a >50% decrease in probability of eliciting an action potential, consistent with the resolution reported by other investigators<sup>12,14</sup>. Stimulation of putative presynaptic cells was repeated 20 times to test the stability of each putative connection and allow averaging to identify small amplitude potentials. Connections were scored by manual annotation using a voltage deconvolution technique and signal to noise threshold as previously described<sup>6</sup>.

### *mFISH gene selection*

Gene panels are selected using a combination of manual and algorithmic based strategies, and require a reference single cell/nucleus RNA-seq data set from the same tissue (in this case, ~12,000 single cells in mouse primary visual cortex<sup>2</sup>). First, an initial set of high-confidence marker genes are selected through a combination of literature search and analysis of the reference data. These genes are used as input for a greedy algorithm (detailed below). Second, the reference RNA-seq data set is filtered to only include genes compatible with mFISH. Retained genes need to be 1) long enough to allow probe design (> 960 base pairs); 2) expressed highly enough to be detected (FPKM ≥ 10), but not so high as to overcrowd the signal of other genes in a cell (FPKM < 500); 3) expressed with low expression in off-target cells (FPKM < 50 in non-neuronal cells); and 4) differentially expressed between cell types (top 500 remaining genes by marker score<sup>20</sup>). To more evenly sample each cell type, the reference data

set is also filtered to include a maximum of 50 cells per cluster.

The main step of gene selection uses a greedy algorithm to iteratively add genes to the initial set. To do this, each cell in the filtered reference data set is mapped to a cell type by taking the Pearson correlation of its expression levels with each cluster median using the initial gene set of size  $n$ , and the cluster corresponding to the maximum value is defined as the “mapped cluster”. The “mapping distance” is then defined as the average cluster distance between the mapped cluster and the originally assigned cluster for each cell. In this case a weighted cluster distance, defined as one minus the Pearson correlation between cluster medians calculated across all filtered genes, is used to penalize cases where cells are mapped to very different types, but an unweighted distance, defined as the fraction of cells that do not map to their assigned cluster, could also be used. This mapping step is repeated for every possible  $n+1$  gene set in the filtered reference data set, and the set with minimum cluster distance is retained as the new gene set. These steps are repeated using the new gene set (of size  $n+1$ ) until a gene panel of the desired size is attained. Code for reproducing this gene selection strategy is available as part of the *mfishtools* R library (<https://github.com/AllenInstitute/mfishtools>).

### *mFISH sample preparation*

Slices were fixed in 4% PFA for 2 hours at room temperature (RT), washed three times in PBS for 10 min each, then transferred to 70% EtOH at 4°C for a minimum of 12 hours, and up to 30 days. Slices were then incubated in 8% SDS in PBS at RT for two hours with agitation. The solution was exchanged with 2X SSC three times, slices were washed for one hour at RT, followed by two additional one hour washes with fresh 2X SSC.

### *In situ HCR*

We performed HCR v3.0 using reagents and a modified protocol from Molecular Technologies and Molecular Instruments<sup>8</sup>. Slices were incubated in pre-warmed 30% probe hybridization buffer (30% formamide, 5X sodium chloride sodium citrate (SSC), 9 mM citric acid pH 6.0, 0.1% Tween 20, 50 µg/mL heparin, 1X Denhardt's solution, 10% dextran sulfate) at 37°C for 5 min, then incubated overnight at 37°C in hybridization buffer with the first three pairs of probes added at a concentration of 4 nM (Table 1). The hybridization solution was exchanged 3 times with 30% probe wash buffer (30% formamide, 5X SSC, 9 mM citric acid pH 6.0, 0.1% Tween 20, 50 µg/mL heparin) and slices were washed for one hour at 37°C. Probe wash buffer was briefly exchanged with 2X SSC, then amplification buffer (5X SSC, 0.1% Tween 20, 10% dextran sulfate) for 5 min. Even and odd hairpins for each of the three genes were pooled and snap-cooled by heating to 95°C for 90 seconds then cooling to RT for 30 min. The hairpins were then added to amplification buffer at a final concentration of 60 nM, and slices were incubated in amplification solution for 4 hours at RT. This was followed by a brief wash with 2X SSC and a one hour, RT incubation in 2X SSC containing 8 µg/µl Brilliant Violet 421™ Streptavidin (BioLegend, Cat. No. 405225) and 0.05% Tween 20. Slices were washed three times for 10 min in 2X SSC.

For each round of imaging, an aliquot of 67% 2,2'-Thiodiethanol (TDE) solution was prepared for use as a clearing and immersion fluid.  $\geq 99\%$  TDE (Sigma-Aldrich) was mixed with DI water to create a 67% TDE solution with a refractive index of 1.46, verified by a pocket refractometer (PAL-RI, Atago). Slices were transferred to 67% TDE and allowed to equilibrate for at least 1 hour at room temperature prior to imaging.

### *iSPIM imaging*

Slices were mounted by transferring to a 25 mm circular, refractive index-matching (RI = 1.46) quartz coverslip (01019-AB, SPI Supplies) secured into a custom 3D printed coverslip holder (reference). The coverslip was then placed on a 25 mm round fused silica mirror blank (PF10-03, Thorlabs), placed in the center of a custom 3D printed large volume sample chamber (<https://github.com/PRNicovich/3D-Printed-Optics-Lab-Parts/tree/master/ASI%20Large%20Volume%20Chamber>), such that the sample was positioned in between the coverslip and the mirror blank. A syringe was used to fill any air pockets with 67% TDE solution. The coverslip holder containing the coverslip was loosely screwed in to the bottom of the sample chamber to secure the sample.

Imaging was performed using an Inverted Selective Plane Illumination Microscope (iSPIM) by Applied Scientific Instrumentation (ASI) configured as a single-sided system and equipped with an XY automated stage (MS-2000, ASI). The sample chamber, in place of a stage insert, was mounted on the stage and filled with 67% TDE solution. Microscope controls and image acquisition were carried out using custom in-house scripts and the ASI diSPIM Device Control plugin for Micro-Manager 1.4.

Multicolor stacks were acquired using a stage scan acquisition mode and a slice step size of  $0.748\mu\text{m}$ . At this spacing, pixels from neighboring frames in the stack are aligned vertically (perpendicular to the slice plane) with a modulus of four pixels. An illumination objective (Cleared Tissue Objective, 16.7x, 0.4 NA, 12mm WD, ASI) was used to generate a light sheet. Brilliant Violet 421 was excited with a Vortran Stradus-405-100 laser and Semrock FF02-447/60 emission filter. mTFP1 and Alexa-488 were excited with a Stradus-488-150 laser (Vortran) and Olympus U-MWG emission filter (510-550 nm). EYFP was excited with a Stradus-514-60 laser (Vortran) and Semrock FF01-550/32 emission filter. Alexa-546 was excited with a Stradus-561-50 laser (Vortran) and Semrock FF01-580/23 emission filter. Alexa-594 was excited with a MGL-III-589 50mW laser (Changchun New Industries) and Semrock FF01-615/24 emission filter. Alexa-640 was excited with a Stradus-642-110 laser (Vortran) and Semrock FF01-432/515/595/730 emission filter.

Laser powers were maintained at  $<10\text{mW}$  for all imaging experiments and modulated through a NicoLase laser sequencer<sup>25</sup>. Fluorescence was detected through a second, identical cleared tissue objective and imaged onto a digital CMOS camera (ORCA-Flash4.0, Hamamatsu) at 50 ms exposure time. Raw acquired data was immediately saved to a network attached storage (NAS) device as sequential concatenated TIFF stacks, split into files 4.2 GB in size.

### *Stripping and subsequent hybridization rounds*

To strip the signal in preparation for subsequent rounds, 67% TDE was exchanged with 2X SSC three times and samples were washed for 1 hour. 2X SSC was replaced with 1X DNase buffer for 5 min and then a 1:50 dilution of DNase I in DNase buffer (DNase I recombinant, RNase-free, Roche, Cat. No. 04716728001), and incubated for 1 hour at 37°C. This solution was replaced with fresh DNase solution before incubating slices overnight at 37°C. Slices were washed with 65% formamide in 2X SSC for one hour at 37°C, then 2X SSC for one hour at RT, before being transferred to 67% TDE for at least one hour. After imaging to confirm the signal was gone, the slices were washed in 2X SSC for one hour to remove TDE before proceeding to subsequent hybridization rounds, which followed the protocol described above, except omitting the incubation in streptavidin solution.

### *Computational data processing pipeline*

As-acquired TIFF stacks were each resliced into individual planes along the  $xz$  plane of the camera coordinate space, corresponding to planes parallel to the  $x'y'$  plane of the stage coordinate space. Each resliced plane is 2048 pixels by approximately 500 pixels in size and contains data for one color channel.

These planes must be deskewed from the oblique camera perspective into the stage coordinate space. The stage step size above is purposefully chosen such that cumulatively translating every second plane along the camera  $z$  axis by one pixel in the  $y$  axis closely approximates this skew transformation. This approach produces negligible errors on the scale of a few pixels due to the discrete shear, but is a more efficient calculation than, for example, an affine transform for datasets of this scale.

The  $x'y'z'$  position of each resliced plane in the image volume is recorded in a Render tilespec JSON file (<https://github.com/saalfeldlab/render>). This position includes the deskew transformation applied to the relevant planes. An updated transformation, such as to correct for stage alignment between imaged strips or color channels, applies to the tilespec JSON file and not the original planes. Given a specified bounding box in the image volume the Render server returns the desired voxels on-the-fly from discrete planes stored on disk.

Pre-computing a multi-resolution image pyramid files using Cloud-Volume and Igneous python libraries (<https://github.com/seung-lab>) aids in rapid visualization of the image volumes. For each data set we generate this pre-computed volume and can then view these through NDViz on a standard web browser<sup>11</sup>. Projection images along each axis and for each imaged color channel are generated through this pre-computed volume for use in the cross-modality alignment.

Targeting coordinates from the upstream synaptic physiology experiment metadata are transformed into coordinates in units of microns with positions relative to the filled cell. This coordinate point cloud is overlaid on an  $x'y'$  maximum intensity projection of the filled cell and reporter fluorescence channels from the light sheet microscope acquisitions. The coordinate point cloud rotates about the pinned filled cell position to find a maximal correspondence between the point cloud and filled cells in the reporter projection image. A corollary workflow finds updates the correspondence transform of the point cloud against  $y'z'$  and  $x'z'$  projections. Once a user finds these rough alignments, an automated non-linear

distortion locates the final target cell positions in the imaging volume. This non-linear distortion finds the closest regional maximum within a bounding box (typically  $25\ \mu\text{m} \times 25\ \mu\text{m}$  around the rough point position) of the intensity of the reporter projection image following the application of a uniformity filter (`scipy.ndimage.filters.uniform_filter`; scale of  $15\ \mu\text{m}$ ).

Sequential rounds of mFISH staining and light sheet imaging independently travel through this correspondence workflow. The final output is a set of point clouds where each point is associated with a target cell in the image space volume for a given round of light sheet imaging. The Render service returns a sub-volume (typically  $50\ \mu\text{m} \times 50\ \mu\text{m} \times 150\ \mu\text{m}$ ) of all acquired color channels for each point in each imaging round. A Frangi filter applied to the reporter channel signal (`skimage.filter.frangi`; scale range = (2, 20) pixels, betas = (1, 2)) followed by Otsu thresholding defines the boundary of the target cell within the image sub-volume. The intensity of the mFISH signals within this binarized volume provides inputs for the transcriptomic assignment.

An example cell positive for the mFISH probe is chosen for each transcript probed. The signal for each pulled target cell within this color channel and the control cell is individually background-subtracted and log transformed before all being normalized to the same colormap range as the control cell signal. These sets of images for each transcript are assembled into the intensity-based heat map shown in Figure 4E.

## Supplemental Information

Table 1 – HCR probes used in this study

| <b>Gene name</b> | <b>Accession</b> | <b>Initiator</b> | <b># Probes Pairs</b> | <b>Fluorophore</b> |
|------------------|------------------|------------------|-----------------------|--------------------|
| Moxd1            | NM_021509.5      | B3               | 10                    | AlexaFluor 546     |
| Penk             | NM_001348209.1   | B4               | 11                    | AlexaFluor 594     |
| Baiap3           | NM_001163270.1   | B5               | 10                    | AlexaFluor 647     |
| Crh              | NM_205769.3      | B2               | 10                    | AlexaFluor 546     |
| Hpse             | NM_152803.4      | B3               | 10                    | AlexaFluor 594     |
| Crhr2            | NM_001288620.1   | B1               | 10                    | AlexaFluor 647     |
| Tac1             | NM_001311060.1   | B3               | 10                    | AlexaFluor 594     |
| Sst              | NM_009215.1      | B2               | 11                    | AlexaFluor 546     |
| Calb2            | NM_007586.1      | B1               | 10                    | AlexaFluor 647     |
